# Supplementary material
Source: PubMed Central journal article supplement (PMC3825457)
Supplement: NIHMS525820-supplement-Tables.pdf [file NIHMS525820-supplement-Tables.pdf]

Table 1. Q-PCR Primers

|              |         |                         |
|--------------|---------|-------------------------|
| hFli1        | forward | GGATGGCAAGGAACTGTGTAA   |
|              | reverse | GGTTGTATTATAGGCCAGCAGTG |
| hCOL1A2      | forward | GATGTTGAACTTGTTGCTGAGG  |
|              | reverse | TCTTTCCCCATTCATTTGTCTT  |
| hGAPDH       | forward | GGTCTCCTCTGACTTCAACA    |
|              | reverse | AGCCAAATTCGTTGTCATAC    |
| mFli1        | forward | AGACCATGGGCAAGAACA      |
|              | reverse | GCCCCAGGATCTGATAAGG     |
| mER $\alpha$ | forward | GCTCCTAACTTGCTCCTGGAC   |
|              | reverse | CAGCAACATGTCAAAGATCTCC  |
| mColl1a1     | forward | GCCAAGAAGACATCCCTGAAG   |
|              | reverse | TGTGGCAGATACAGATCAAGC   |
| mB2MG        | forward | TCGCTCGGTGACCCTAGTCTTT  |
|              | reverse | ATGTTCGGCTTCCCATTCTCC   |

Table 2. Primers for the ER $\alpha$  Promoter Analysis.

A)

|                   |         |                           |
|-------------------|---------|---------------------------|
| human ER $\alpha$ | forward | GTCTGAGGCTGCGGCGTTCGGCTCC |
|                   | reverse | ATCCATAGCCATACTTCCCTTGTC  |

B)

|                |    |                          |
|----------------|----|--------------------------|
| Forward primer | A  | CATGCGCTGCGTCGCTCTAA     |
|                | B  | GCCCAGTCTTCCCTGGGC       |
|                | C  | TCTCTCGGCCCTTGA CTTC     |
|                | D  | GTGGGGCTGGAGACACATTCAACG |
|                | E2 | AGCCTCAAATATCTCCAAAATCT  |
|                | F  | TTCTATAGCATAAGAAGACAG    |
| Reverse primer |    | TTGCTGCTGTCCAGGTACAC     |

Table 3. Primers for CHIP analysis

|                                |         |                       |
|--------------------------------|---------|-----------------------|
| ER $\alpha$ EBS<br>(1300-1090) | forward | TGTTGGGTGTTTGGGATAGC  |
|                                | reverse | GCACACGCACATACACACAC  |
| ER $\alpha$ EBS<br>(681-523)   | forward | CAGAAGGTTGTGGAAGGGTC  |
|                                | reverse | GAACTGACAGGGGGCATCTG  |
| ER $\alpha$ EBS<br>(458-298)   | forward | TGCCCTATCTCGGTTACAGTG |
|                                | reverse | CGGCTTTCTCTAATGTGCTG  |
| Negative<br>control            | forward | ATGGTTGCCACTGGGGATCT  |
|                                | reverse | TGCCAAAGCCTAGGGGAAGA  |

Table 4. Oligonucleotides sequences used for DNA affinity precipitation assay.

|             |         |                                             |
|-------------|---------|---------------------------------------------|
| ERA-WT375   | Forward | CGTATTTCTAGCCAACGAGGAGGGGGAATCAAACAGAAAGAG  |
|             | Reverse | CTCTTTCTGTTTGATTCCCCCTCCTCGTTGGCTAGAAATACG  |
| ERA-MUT375  | Forward | CGTATTTCTAGCCAACGAGGAGGGGGCATCAAACAGAAAGAG  |
|             | Reverse | CTCTTTCTGTTTGATGCCCCCTCCTCGTTGGCTAGAAATACG  |
| ERA-WT577   | Forward | CTCCTGATGGCAAATGCAGCTCTTCCTATATGTATAACCTG   |
|             | Reverse | CAGGGTATACATATAGGAAGAGCTGCATTTTGCCATCAGGAG  |
| ERA-MUT577  | Forward | CTCCTGATGGCAAATGCAGCTTTTCCTATATGTATAACCTG   |
|             | Reverse | CAGGGTATACATATAGGAAAAGCTGCATTTTGCCATCAGGAG  |
| ERA-WT630   | Forward | CTACTTTGGGAGCATTTTGCAGAGGAAGAACTGAGGTCCTGGC |
|             | Reverse | GCCAGGACCTCAGTTTCTTCCTCTGCAAATGCTCCCAAAGTAG |
| ERA-MUT630  | Forward | CTACTTTGGGAGCATTTTGCAGAGGTAGAACTGAGGTCCTGGC |
|             | Reverse | GCCAGGACCTCAGTTTCTACCTCTGCAAATGCTCCCAAAGTAG |
| ERA-WT1223  | Forward | CAGAGTCTATTAGGCTGCAGCAAAGGAAGTTTATTCAAAG    |
|             | Reverse | CTTTTGAATAAACTTCCTTTGCTGCAGCCTAATAGACTCTG   |
| ERA-MUT1223 | Forward | CAGAGTCTATTAGGCTGCAGCAAAGGTAGTTTATTCAAAG    |
|             | Reverse | CTTTTGAATAAACTACCTTTGCTGCAGCCTAATAGACTCTG   |
